# Supplementary material for: Modeling Cell-to-Cell Communication Networks Using Response-Time Distributions
Source: PubMed Central journal article supplement (PMC5913757; doi:10.1016/j.cels.2018.01.016), 2018-03-07
Supplement: NIHMS957759-supplement-1.pdf [file NIHMS957759-supplement-1.pdf]

**Cell Systems, Volume 6**

**Supplemental Information**

**Modeling Cell-to-Cell Communication  
Networks Using Response-Time Distributions**

**Kevin Thurley, Lani F. Wu, and Steven J. Altschuler**

# Supplemental Figures and Tables

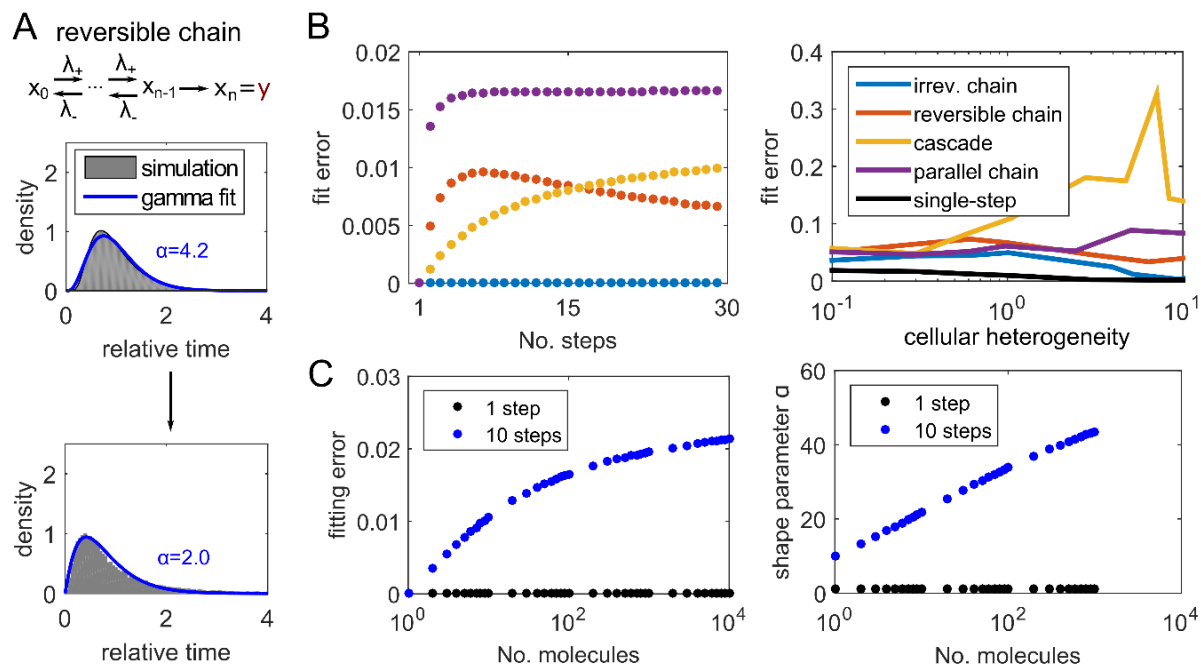

**Figure S1: Supplementary analysis of simple multi-step models. Related to Figure 2.**

(A) Analysis of the reversible chain model, analogous to Figure 2B-D.

(B) Fitting error (Root-mean squared sum of residuals) of best-fit gamma distributions to the indicated models (see Figure 2A-E), analogous to Figure 2G.

(C) Fitting error and shape parameter  $\alpha$  for the parallel chain model (Figure 2D) with varying number of molecules (parameter  $m$ ).

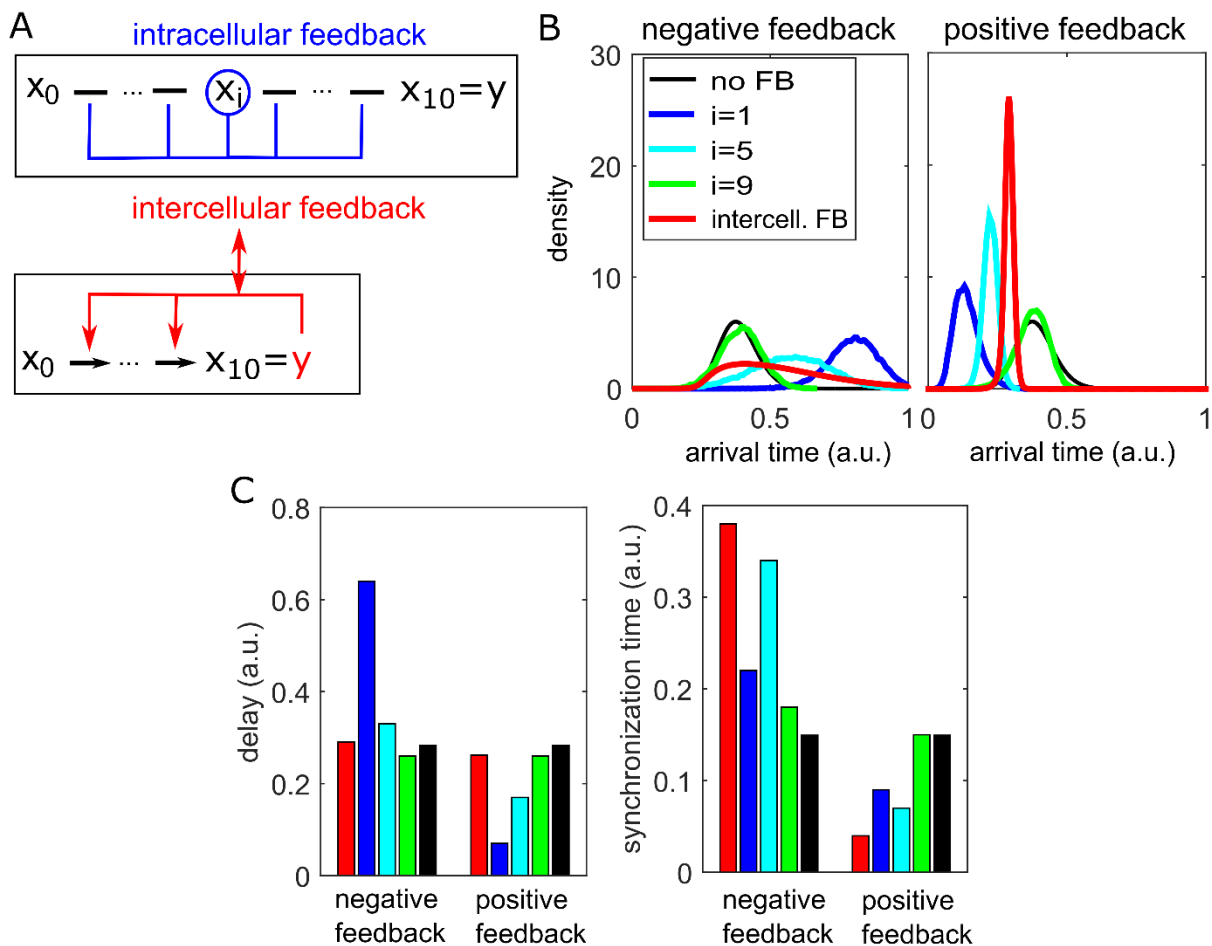

**Figure S2: Comparison of intracellular and intercellular feedback. Related to Figure 3.**

(A) Model scheme: The parallel chain model (Figure 2D;  $n = 10$  steps,  $m = 100$  molecules) is implemented either with inter-cellular feedback between cells (as in Figure 3B-D, left panels), or with intra-cellular feedback. The inter-cellular feedback is implemented by allowing molecules in the final state (here  $x_{10}$ ) to alter all rate parameters in all cells. For intra-cellular feedback, the reaction rate depends on the number of molecules in an intermediate state  $x_i$  and there is no cell-cell communication.

(B-C) Arrival time distributions and values of synchronization time and delay for the indicated models: no feedback (FB); intracellular feedback (negative or positive) from state  $x_i$  with  $i = 1, 5, 9$ ; intercellular feedback (negative or positive).

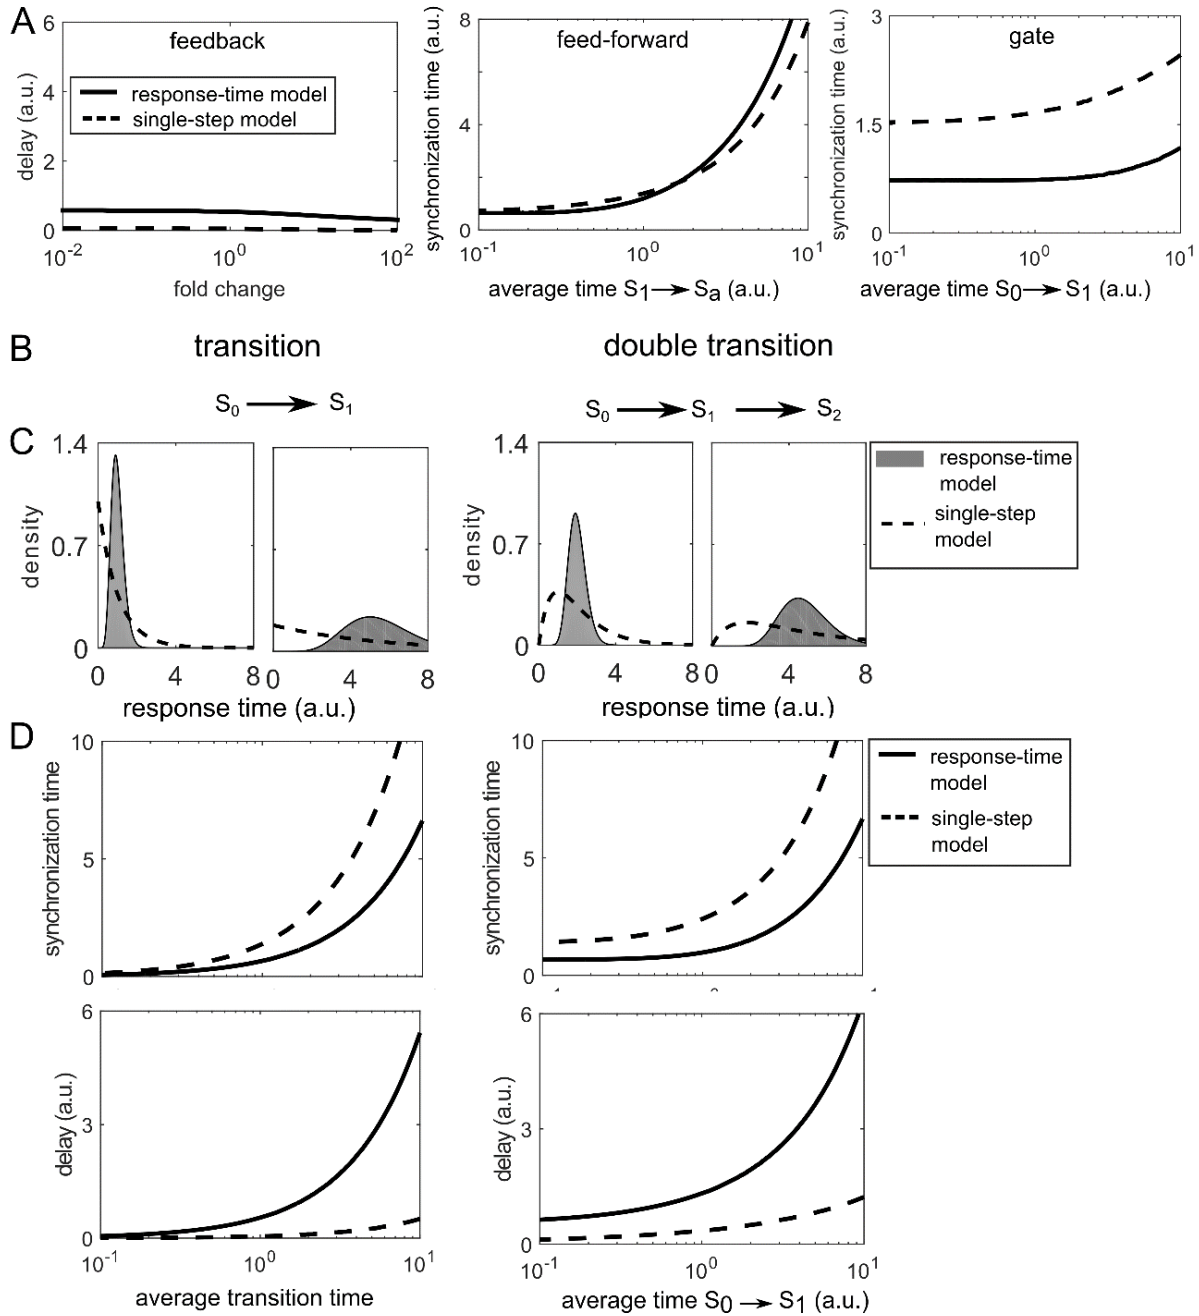

**Figure S3: Supplementary analysis of intercellular interaction motifs. Related to Figure 3.**  
 (A) Additional analysis of network motifs (see Figure 3B-D).

(B-D) Additional network motifs (see Figure 3B-D).

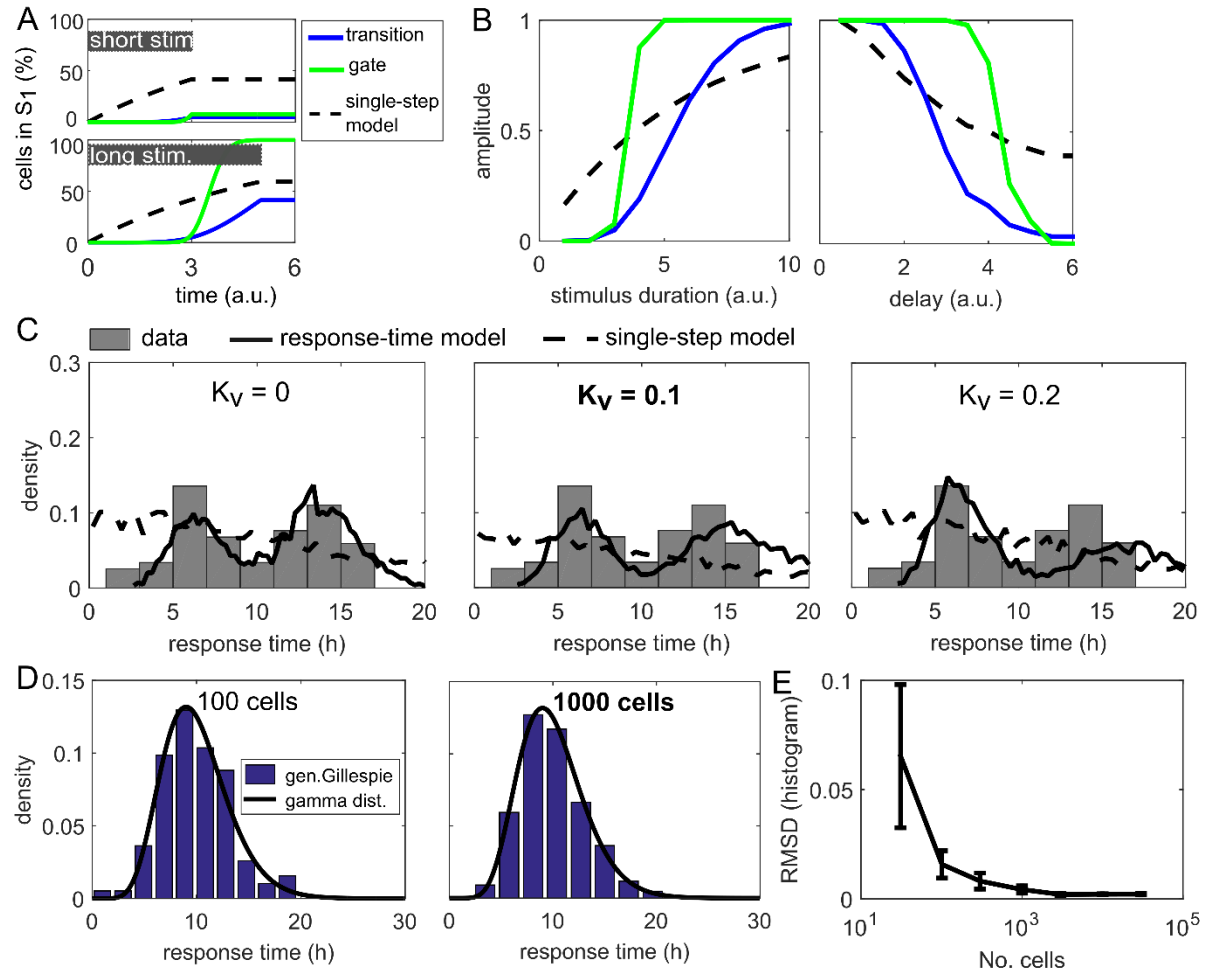

**Figure S4: Supplementary analysis of response-time modeling applications. Related to Figure 5.**

(A) Simulations are carried out with the best-fit gamma distributions (“response-time model”) or exponential distributions (“single-step model”) to the arrival-time distributions arising in the gate and transition motifs (see Figure 4), all with the same delay value of  $t_{\text{delay}} = 3$ . Black bars indicate stimulus duration.

(B) Maximal fraction of activated cells after stimulation (“Amplitude”) at varying stimulus duration (at  $t_{\text{delay}} = 3$ ) and delay (at duration  $t_d = 5$ ) (see Star Methods).

(C) Simulations of IFN- $\gamma$  secretion onset (Figure 5E-G) with varying feedback strength  $K_V$ . Bold: Feedback strength used Figure 5G.

(D-E) Validation of the generalized Gillespie algorithm used in Figure 5E-G. (D) Simulations of the 10-step process with indicated number of cells, and comparison to the exact solution (gamma distribution, see Equation 1). (E) Root-mean-square deviation (mean and standard deviation from 4 simulations) in histograms such as shown in (D).

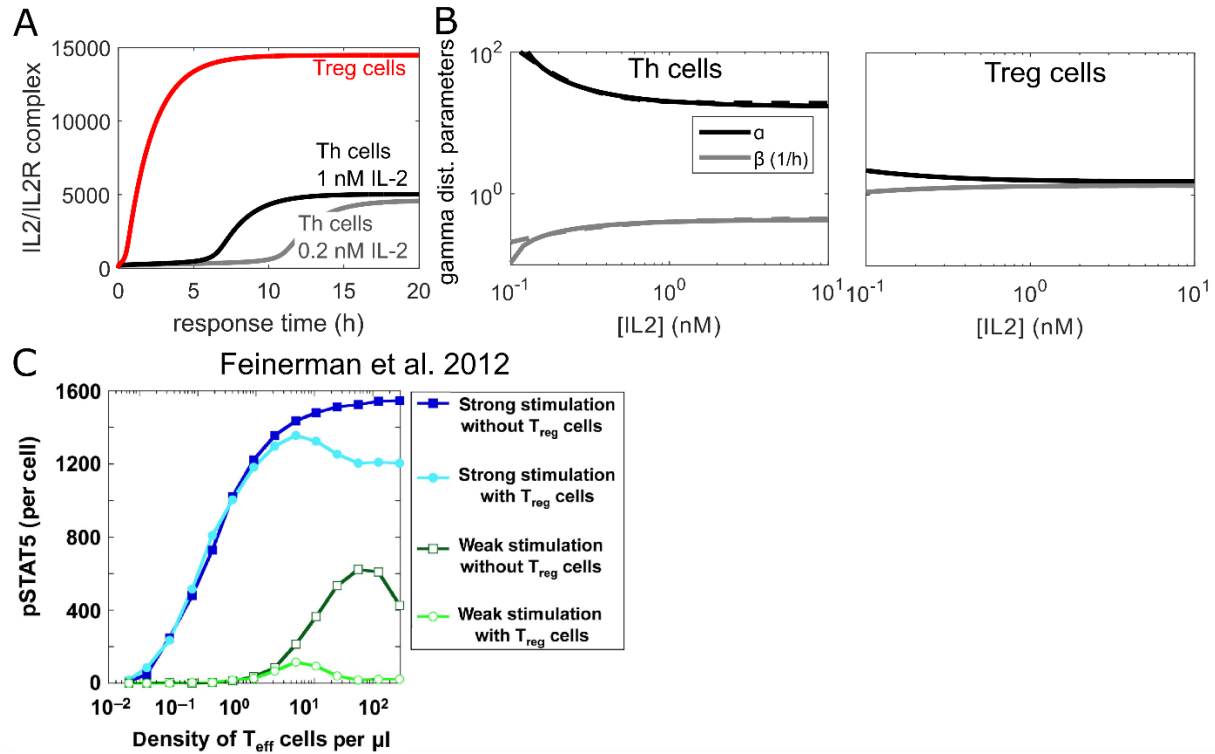

**Figure S5: Supplementary data for IL-2 competition simulations. Related to Box 2.**

(A) Simulation of the model shown in Box Figure, panel B, with indicated extracellular IL-2 concentration.

(B) Best-fit gamma distribution parameters  $\alpha$  and  $\beta$  to curves as shown in Box Figure, panel C, which were obtained from simulations as shown in (A), for a range of IL-2 concentrations. Dashed lines are interpolating curves used for the implementation of the response-time model (see Star Methods).

(C) IL-2 competition (or “tug-of-war”) simulation from (Feinerman et al., 2010), reprinted for comparison with simulations shown in Box Figure, panel D (right).

**Table S1: Parameter values used in Figure 5.**

| <b>Description</b>                                    | <b>Value</b>             | <b>Reference</b>      |
|-------------------------------------------------------|--------------------------|-----------------------|
| Half-saturation constant of IL-2 interaction          | 0.05                     |                       |
| Shape parameter of CD25 up-regulation                 | 34.9 (Figure 5E, bottom) | (Dorner et al., 2009) |
| Rate parameter of CD25 up-regulation                  | 0.21 (Figure 5E, bottom) | (Dorner et al., 2009) |
| Shape parameter IL-2 secretion onset                  | 4.33 (Figure 1A)         | (Han et al., 2012)    |
| Rate parameter IL-2 secretion onset                   | 1.36 (Figure 1A)         | (Han et al., 2012)    |
| Shape parameter initial IFN- $\gamma$ secretion onset | 14.7 (Figure 1A)         | (Han et al., 2012)    |
| Rate parameter initial IFN- $\gamma$ secretion onset  | 0.45 (Figure 1A)         | (Han et al., 2012)    |
| Fraction of IL-2+ cells                               | 0.1                      | (Han et al., 2012)    |
| Fraction of early IFN- $\gamma$ + cells               | 0.35                     | (Han et al., 2012)    |
| Fraction of late IFN- $\gamma$ + cells                | 0.55                     | (Han et al., 2012)    |
| Average duration of IL-2 secretion                    | 4 hr                     | (Han et al., 2012)    |
| Average duration of IFN- $\gamma$ secretion           | 4 hr                     | (Han et al., 2012)    |

When figure panels are referred to, the parameter values are computed in those figures based on data in the cited reference.
